# Supplementary figures and images for: Dendritic branch structure compartmentalizes voltage-dependent calcium influx in cortical layer 2/3 pyramidal cells
Source: eLife journal article supplement (doi:10.7554/elife.76993), 2022-03-23

**A**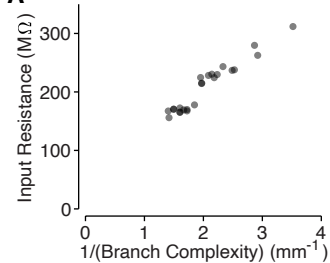**B**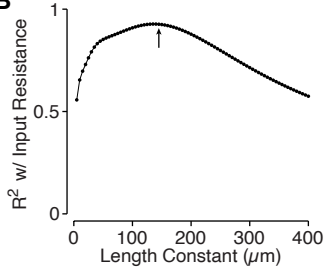**C**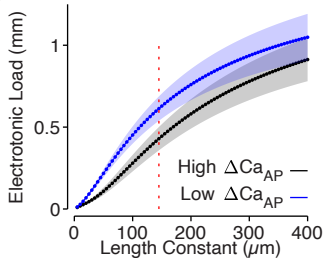

Supplement: supp [file elife-76993-supp-v1.zip]

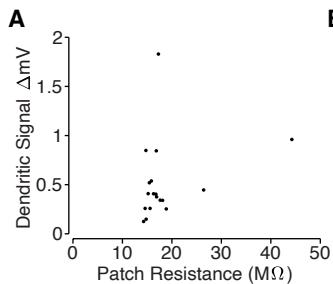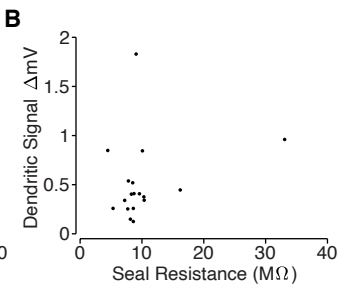

Supplement: supp [file elife-76993-supp-v1.zip]

**A**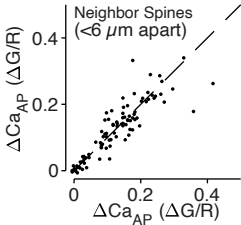**B**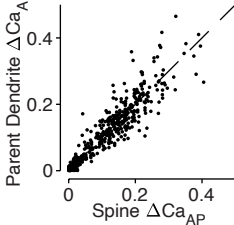

Supplement: supp [file elife-76993-supp-v1.zip]

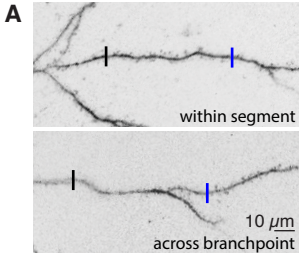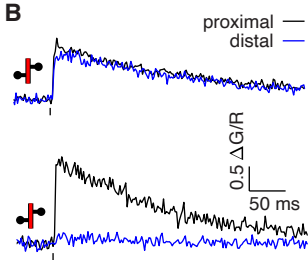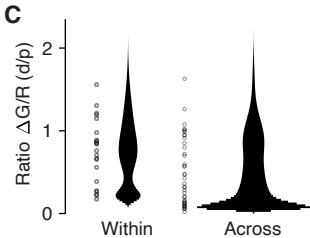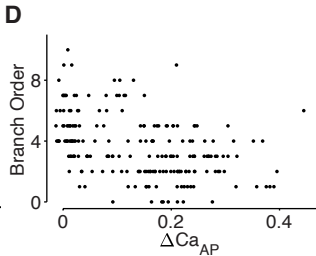

Supplement: supp [file elife-76993-supp-v1.zip]

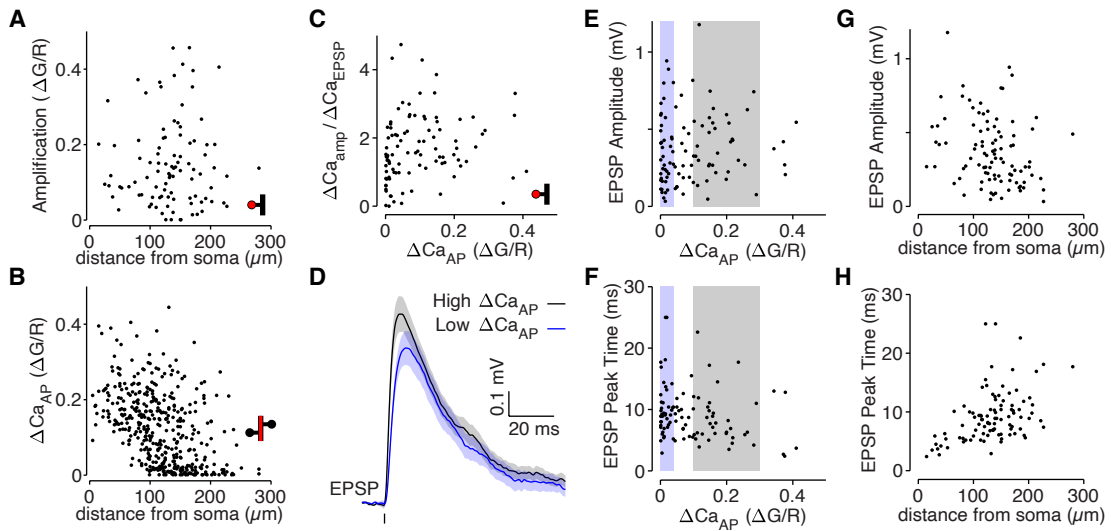

Supplement: supp [file elife-76993-supp-v1.zip]

**A**

point-scan approach

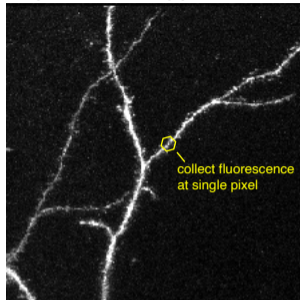**B**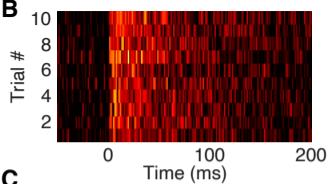**C**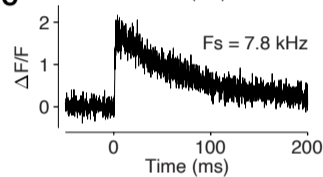**D**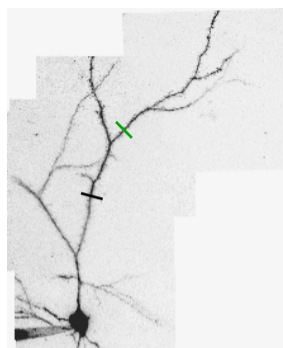**E**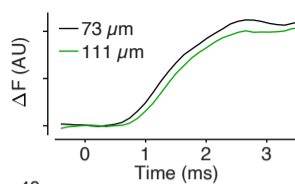**F**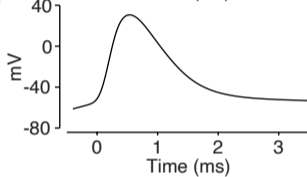**G**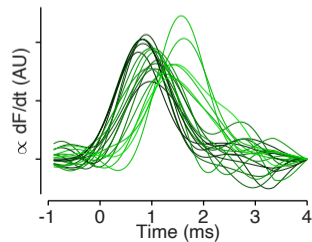**H**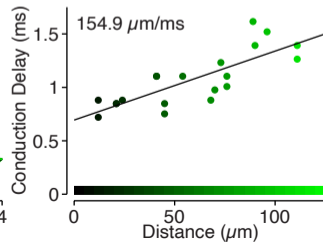**I**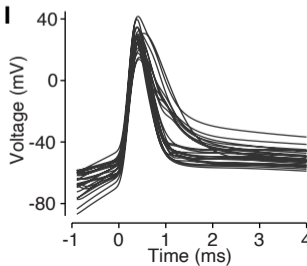**J**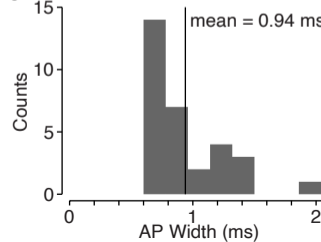

Supplement: supp [file elife-76993-supp-v1.zip]

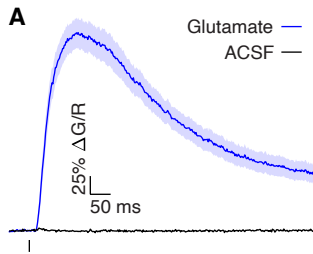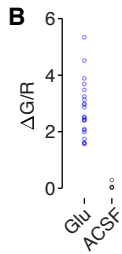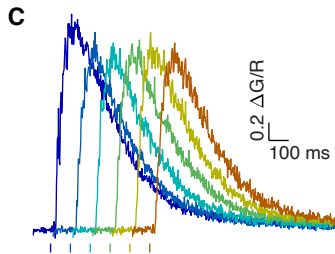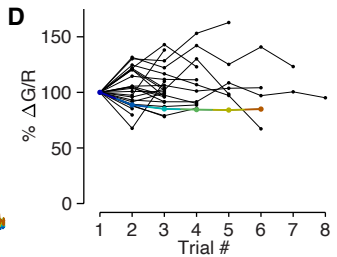

Supplement: supp [file elife-76993-supp-v1.zip]

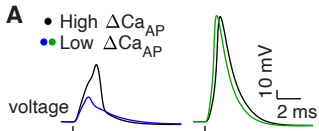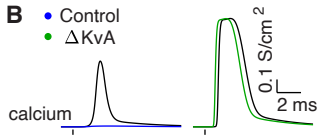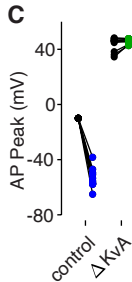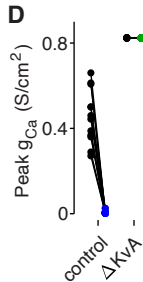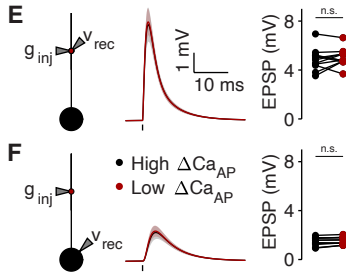

Supplement: supp [file elife-76993-supp-v1.zip]

**A**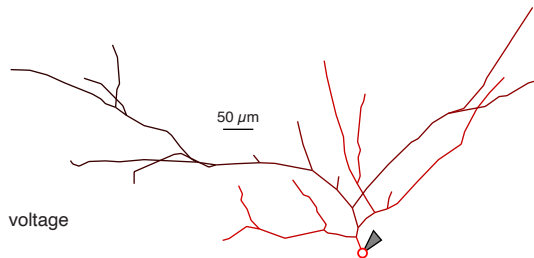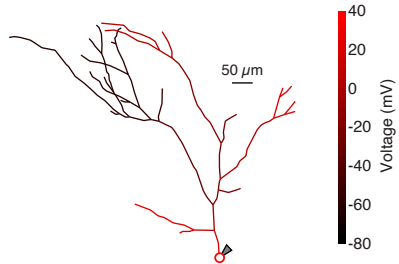**B**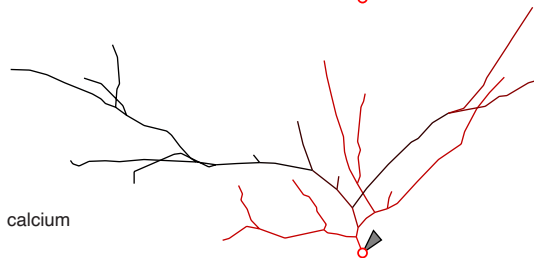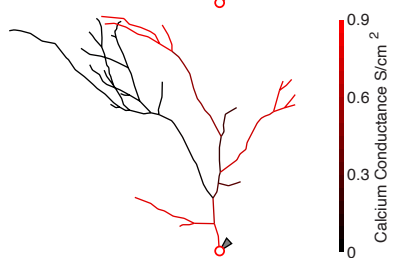

Supplement: supp [file elife-76993-supp-v1.zip]
